# Supplementary material
Source: bioRxiv or medRxiv preprint supplement (https://www.biorxiv.org/highwire/filestream/2694/field_highwire_adjunct_files/6/009373-7.pdf)

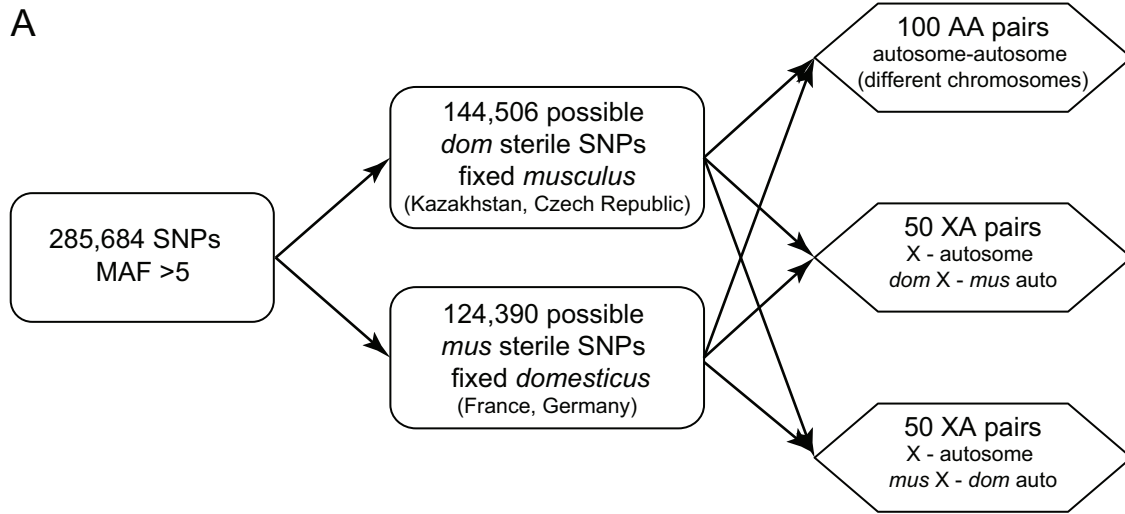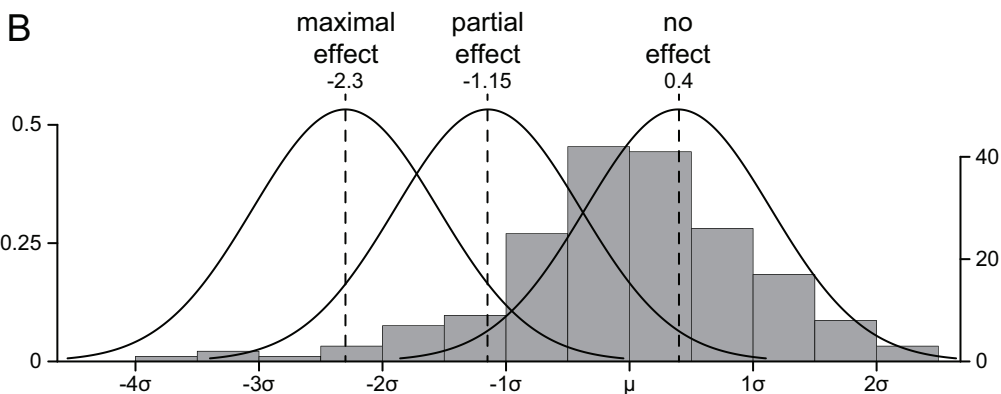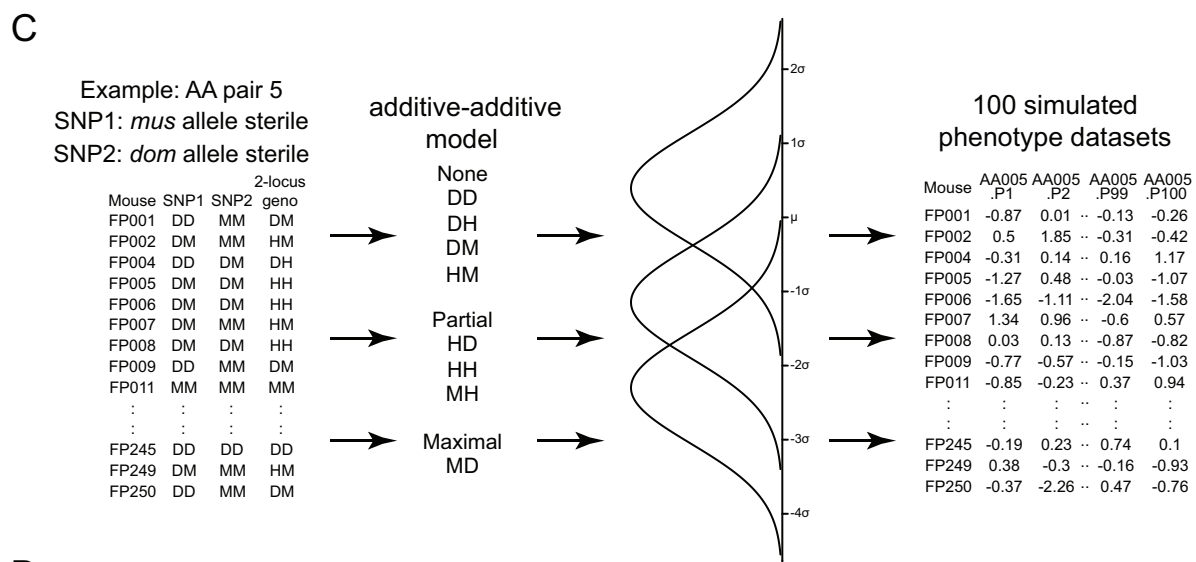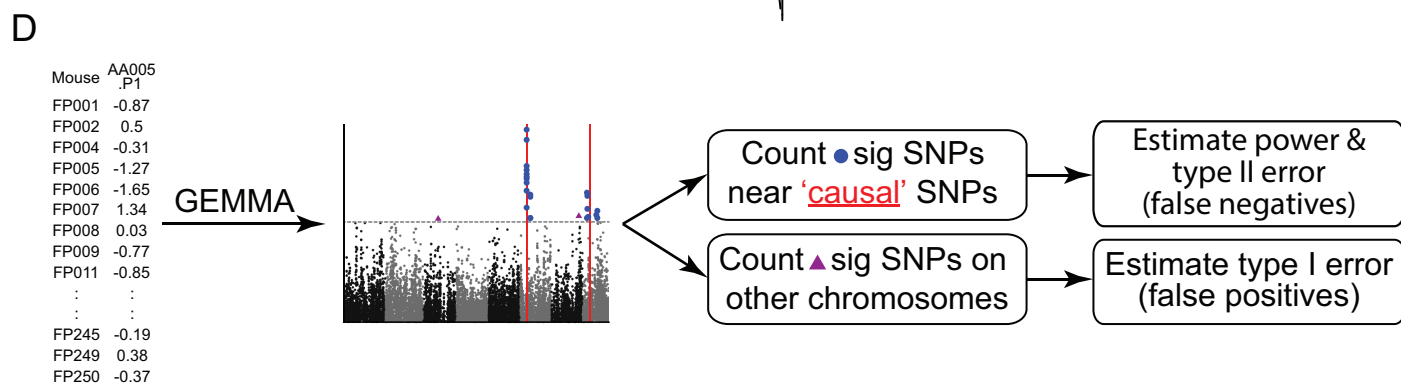

Supplement: Supplementary file [file 009373-7.pdf]
